# Supplementary material
Source: publisher site journal article supplement (https://www.dovepress.com/article/337172)
Supplement: Supplementary file 1 [file get_supplementary_file.php]

1 **Appendix 1 Database search strategy**

2 Database: Ovid MEDLINE(R) and Epub Ahead of Print, In-Process, In-Data-Review & Other Non-  
3 Indexed Citations, Daily and Versions(R) <1946 to August 30, 2021>

4 Search Strategy:

5 -----

6 1 research\*.ti,ab,kf.

7 2 allied health personnel/ or anesthetists/ or audiologists/ or dentists/ or nurses/ or nutritionists/  
8 or occupational therapists/ or optometrists/ or pharmacists/ or physical therapists/ or physicians/  
9 or midwifery/ or medical staff, hospital/ or nursing staff, hospital/ or speech language pathology/

10 3 (allied health personnel or anesthetist\* or anaesthetist\* or audiologist\* or dentist\* or nurs\* or  
11 nutritionist\* or occupational therapist\* or optometrist\* or pharmacist\* or physical therapist\* or  
12 Physical therap\* or physician\* or midwi\* or medical staff or speech language pathology\* or  
13 speech pathologist\* or doctor\*).ti,ab,kf.

14 4 2 or 3

15 5 Motiv\*.ti,ab,kf.

16 6 motivational interview\*.mp.

17 7 5 not 6

18 8 1 and 4 and 7

19 9 limit 8 to ed=20110101-20210831

20 10 limit 9 to English language

21 \*\*\*\*\*

22

23

24
